# Supplementary material for: The ‘cuckoo strategy’ in ant-lepidoptera association: a facultative parasitism for survival benefits
Source: Research Square preprint supplement (doi:10.21203/rs.3.rs-7405609/v1), 2025-09-10
Supplement: Supplementary file 1 [file 132347fda6cd39eb814e54ff.docx]

Supplementary 2: List of compounds detected in chromatogram other than CHCs. Presence of a specific compound in a particular life stage is indicated with '+'. The blank cell represents absence of compounds.

| **Retention time (Rt)** | **Compounds** | ***O. smaragdina* adult** | ***O. smaragdina* larvae (stage I and II)** | ***P. marginata* larvae (stage I and II)** |
| --- | --- | --- | --- | --- |
| 4.84 | Hexanoic acid | **+** |  | **+** |
| 5.4 | Benzene, 1,2,4-triemthyl- | **+** | **+** | **+** |
| 5.92 | p-Cymene |  |  | **+** |
| 6 | D-Limonene |  |  | **+** |
| 6.6 | Benzene, 1,4-diethyl- | **+** | **+** |  |
| 6.7 | Heptanoic acid | **+** | **+** |  |
| 7.51 | Nonanal |  |  | **+** |
| 7.689 | Hexanoic acid, 2-ethyl- |  |  | **+** |
| 8.48 | Siloxine derivative |  |  | **+** |
| 8.57 | Siloxine derivative | **+** |  |  |
| 8.86 | Octanoic acid | **+** | **+** |  |
| 9.52 | Naphthalene | **+** | **+** | **+** |
| 10.3 | 3-Hydroxy dodecane |  |  | **+** |
| 11.02 | Nonanoic acid | **+** | **+** | **+** |
| 11.37 | Siloxine derivative |  |  | **+** |
| 12.32 | Siloxine derivative |  | **+** | **+** |
| 14.48 | Decanoic acid |  |  | **+** |
| 15.54 | Undecanol |  |  | **+** |
| 19.01 | Siloxine derivative |  |  | **+** |
| 19.31 | Siloxine derivative | **+** | **+** |  |
| 21.07 | Octadecane, 3-ethyl-5-(2-ethylbutyl)- |  |  | **+** |
| 22.25 | Siloxine derivative |  |  | **+** |
| 22.76 | Phen-1,4-diol, 2,3-dimethyl-5-trifluoromethyl- | **+** | **+** | **+** |
| 23.85 | Hexadecanol | **+** | **+** | **+** |
| 24.35 | Hexadecanoic acid | **+** |  |  |
| 24.49 | Butyl octyl phthalate | **+** | **+** |  |
| 25.89 | Siloxine derivative |  |  | **+** |
| 27.19 | Siloxine derivative |  |  | **+** |
| 27.32 | Octadecanoic acid |  |  | **+** |
| 30.03 | Nonadecanol |  | **+** | **+** |
| 31.21 | Siloxine derivative |  |  | **+** |
| 31.86 | Siloxine derivative |  |  | **+** |
| 32.14 | Siloxine derivative |  | **+** |  |
| 32.83 | Phthalic acid, bis-n-octyl ester |  | **+** | **+** |
| 33.08 | Siloxine derivative | **+** |  |  |
| 33.12 | Methyl glycocholate, 3TMS derivative |  |  | **+** |
| 34.83 | Z-(13,14-Epoxy) tetradec-11-en-1-ol acetate |  | **+** | **+** |
| 35.96 | Decanedioic acid, bis (2-ethylhexyl)- | **+** | **+** | **+** |
| 36.19 | Suprene |  | **+** |  |
| 36.23 | Squalene | **+** | **+** | **+** |
| 37.21 | Corynan-17-ol,18,19-didehydro-10-methoxy-, acetate (ester) | **+** |  | **+** |
| 37.89 | Octanic acid, hexadecyl ester | **+** |  |  |
| 39.37 | Cholesterol | **+** |  | **+** |
| 40.17 | Octanoic acid, octadecyl ester | **+** | **+** | **+** |
| 41.49 | Octacosanol | **+** | **+** | **+** |
| 42.287 | Unidentified branched CHC | **+** | **+** | **+** |
