# Supplementary material for: The ‘cuckoo strategy’ in ant-lepidoptera association: a facultative parasitism for survival benefits
Source: Research Square preprint supplement (doi:10.21203/rs.3.rs-7405609/v1), 2025-09-10
Supplement: Supplementary file 2 [file 48bd6125aaa2993c57e656e1.docx]

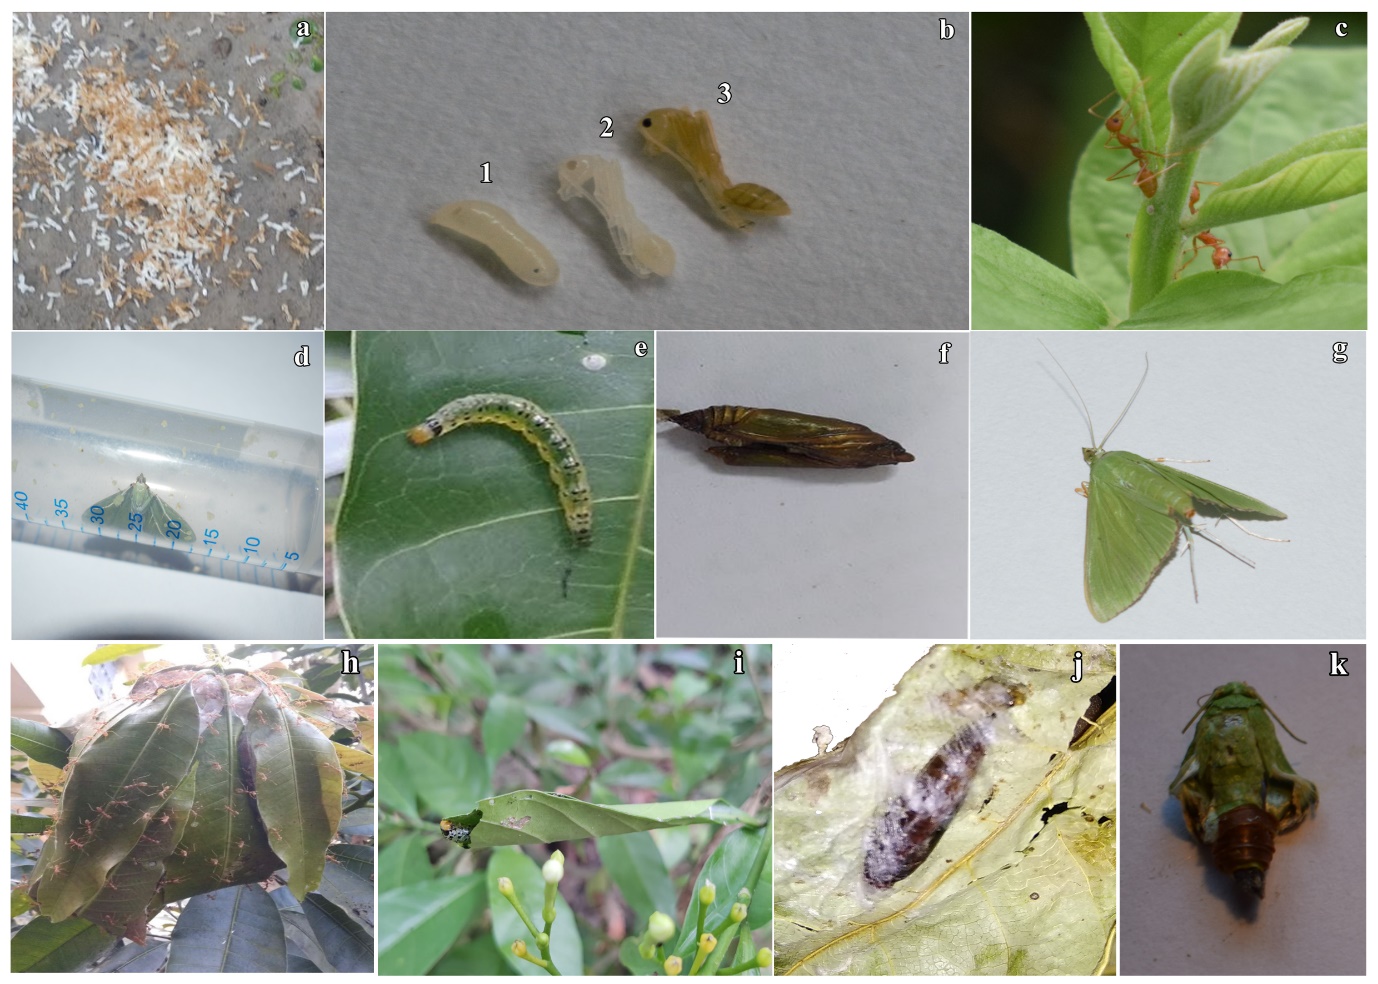
**Supplementary 1.** (a) Egg of *O. smaragdina* (b) different stages of *O. smaragdina* brood, 1,2- *Oecophylla* brood stage-I, 3- *Oecophylla* brood stage-II (c) Adult, *O.smaragdina* (d) *P. marginata* laying eggs inside an Eppendorf tube (e) *P. marginata* larvae (f) Pupae of *P. marginata* (g) Adult, *P. marginata* (h) Natural *O. smaragdina* nest (i) *P. marginata* nest in wild (j) Pupae of *P. marginata* wrapped inside the wild *O. smaragdina* nest (k) Transformation from pupae to adult (*P. marginata*) inside BOD*.*
